# Supplementary material for: Impact of mixing states on aerosol radiative effects and feedback during winter haze episodes over the North China Plain
Source: Royal Society of Chemistry journal article supplement (doi:10.1039/d5ea00126a), 2026-01-01
Supplement: d5ea00126a1.pdf [file d5ea00126a1.pdf]

Table S1 Model performance statistics for T2, WS10, and RH2 (from the M-G case) in the six megacities over NCP during the study period from 1 February to 18 February 2020 (units: K, m s<sup>-1</sup>, %).

| City | Long Name    | Location        | T2    |       |      |      |       | WS10 |     |      |       |       | RH2  |      |      |      |       |
|------|--------------|-----------------|-------|-------|------|------|-------|------|-----|------|-------|-------|------|------|------|------|-------|
|      |              |                 | Obs   | Sim   | R    | MB   | NMB   | Obs  | Sim | R    | MB    | NMB   | Obs  | Sim  | R    | MB   | NMB   |
| BJ   | Beijing      | 116.5°E, 39.8°N | 272.6 | 273.9 | 0.89 | 1.3  | 0.5%  | 2.8  | 2.6 | 0.72 | -0.19 | -6.8% | 61.8 | 68.9 | 0.76 | 7.1  | 11.4% |
| TJ   | Tianjin      | 117.1°E, 39.1°N | 273.4 | 275.0 | 0.92 | 1.6  | 0.6%  | 3.1  | 2.9 | 0.80 | -0.15 | -4.9% | 65.1 | 70.8 | 0.77 | 5.6  | 8.7%  |
| SJZ  | Shijiazhuang | 114.4°E, 38.1°N | 273.7 | 275.4 | 0.88 | 1.7  | 0.6%  | 2.8  | 2.7 | 0.52 | -0.11 | -3.9% | 51.6 | 68.3 | 0.57 | 16.7 | 32.4% |
| ZZ   | Zhengzhou    | 113.7°E, 34.7°N | 278.5 | 278.6 | 0.88 | 0.2  | 0.1%  | 2.8  | 2.7 | 0.62 | -0.03 | -1.1% | 62.5 | 75.5 | 0.84 | 13.0 | 20.8% |
| TY   | Taiyuan      | 112.6°E, 37.8°N | 272.9 | 272.3 | 0.86 | -0.6 | -0.2% | 2.7  | 3.3 | 0.57 | 0.63  | 23.8% | 48.3 | 62.0 | 0.55 | 13.6 | 28.2% |
| JN   | Jinan        | 117.1°E, 36.6°N | 275.5 | 276.8 | 0.93 | 1.2  | 0.4%  | 2.7  | 3.7 | 0.54 | 0.98  | 35.7% | 65.3 | 76.7 | 0.62 | 11.4 | 17.4% |
| ALL  |              |                 | 274.4 | 275.3 | 0.89 | 0.9  | 0.3%  | 2.8  | 3.0 | 0.63 | 0.19  | 7.1%  | 59.1 | 70.4 | 0.69 | 11.2 | 19.8% |

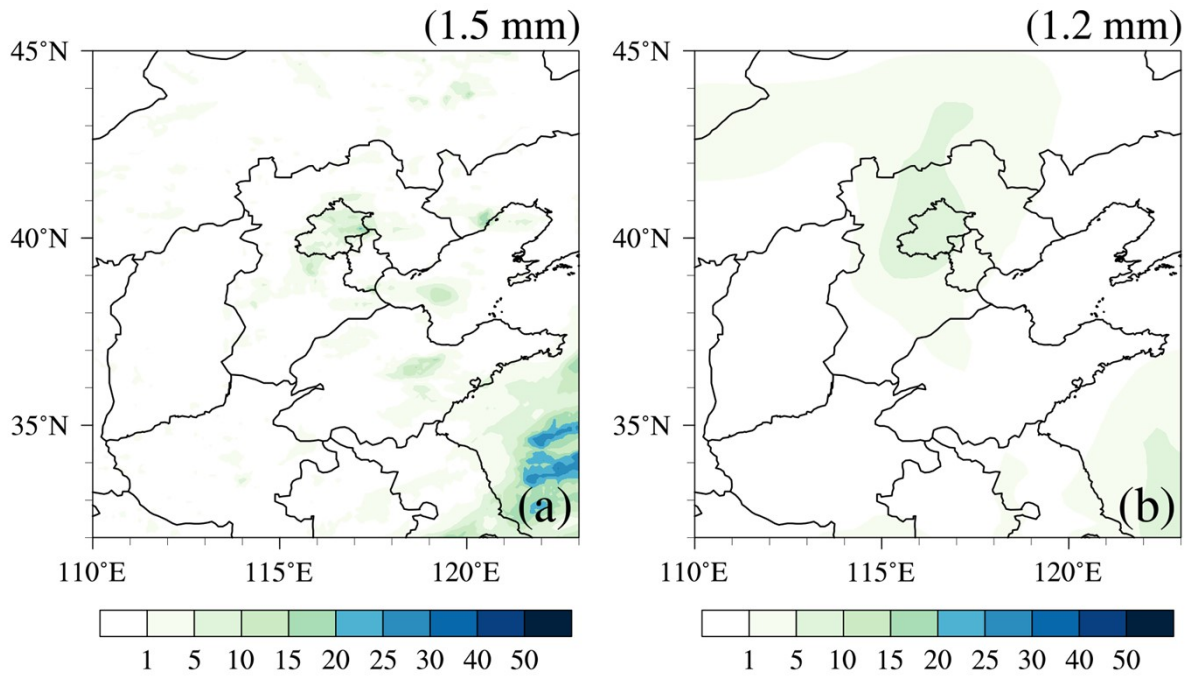

Figure S1 (a) The GPM retrieved, (b) model simulated (from the M-G case) accumulated precipitation during the haze episode on 8-13 February 2020 (unit: mm). The numbers in the upper-right corner of each panel represent domain average values.

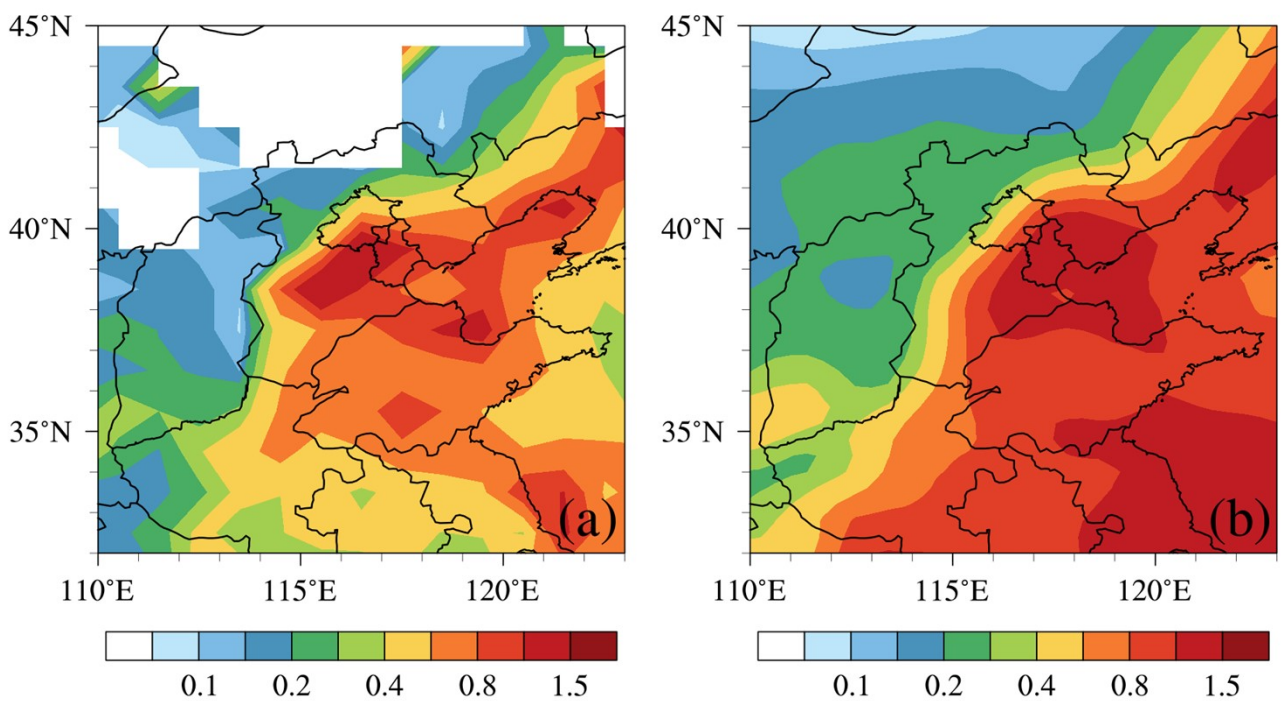

Figure S2 AOD at 550 nm at 10:30 LST from (a) MODIS retrieval and (b) model simulation (from the M-G case), averaged over the haze episode on 8-13 February 2020.

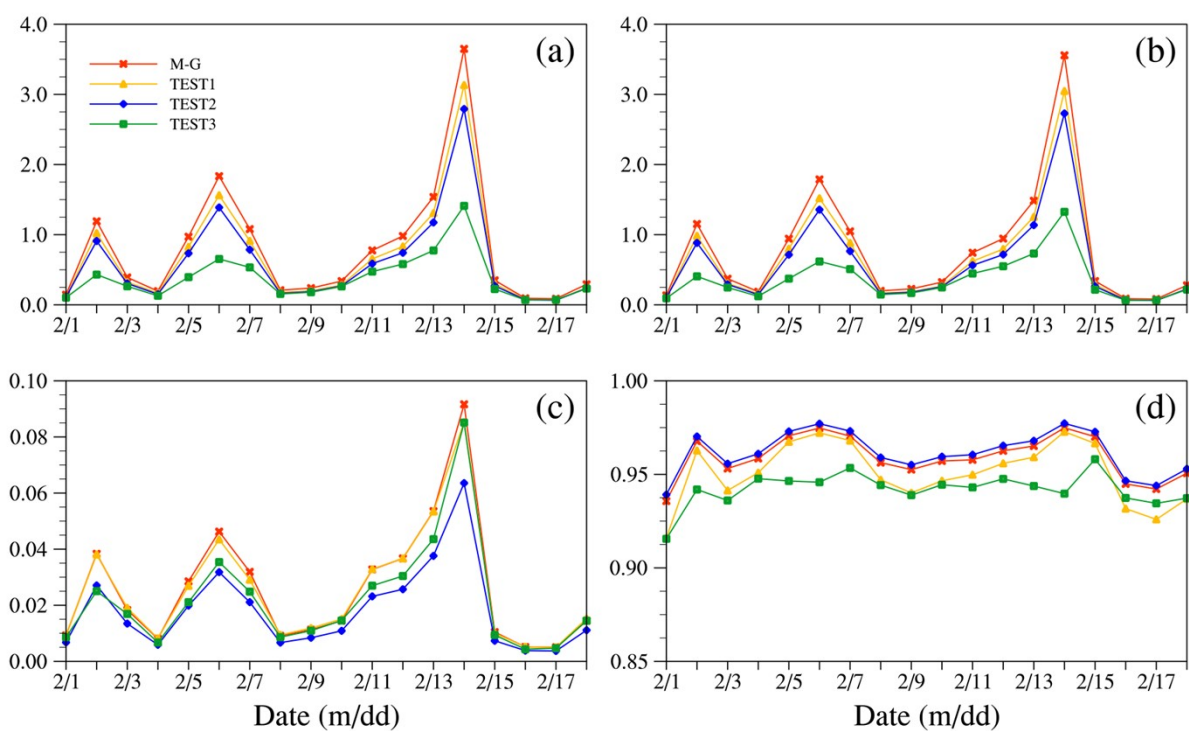

Figure S3 Model simulated daily mean (a) AOD, (b) scattering AOD, (c) absorption AOD, (d) SSA in Beijing on 1-18 February, 2020. Model results from the M-G and the three test cases are presented.

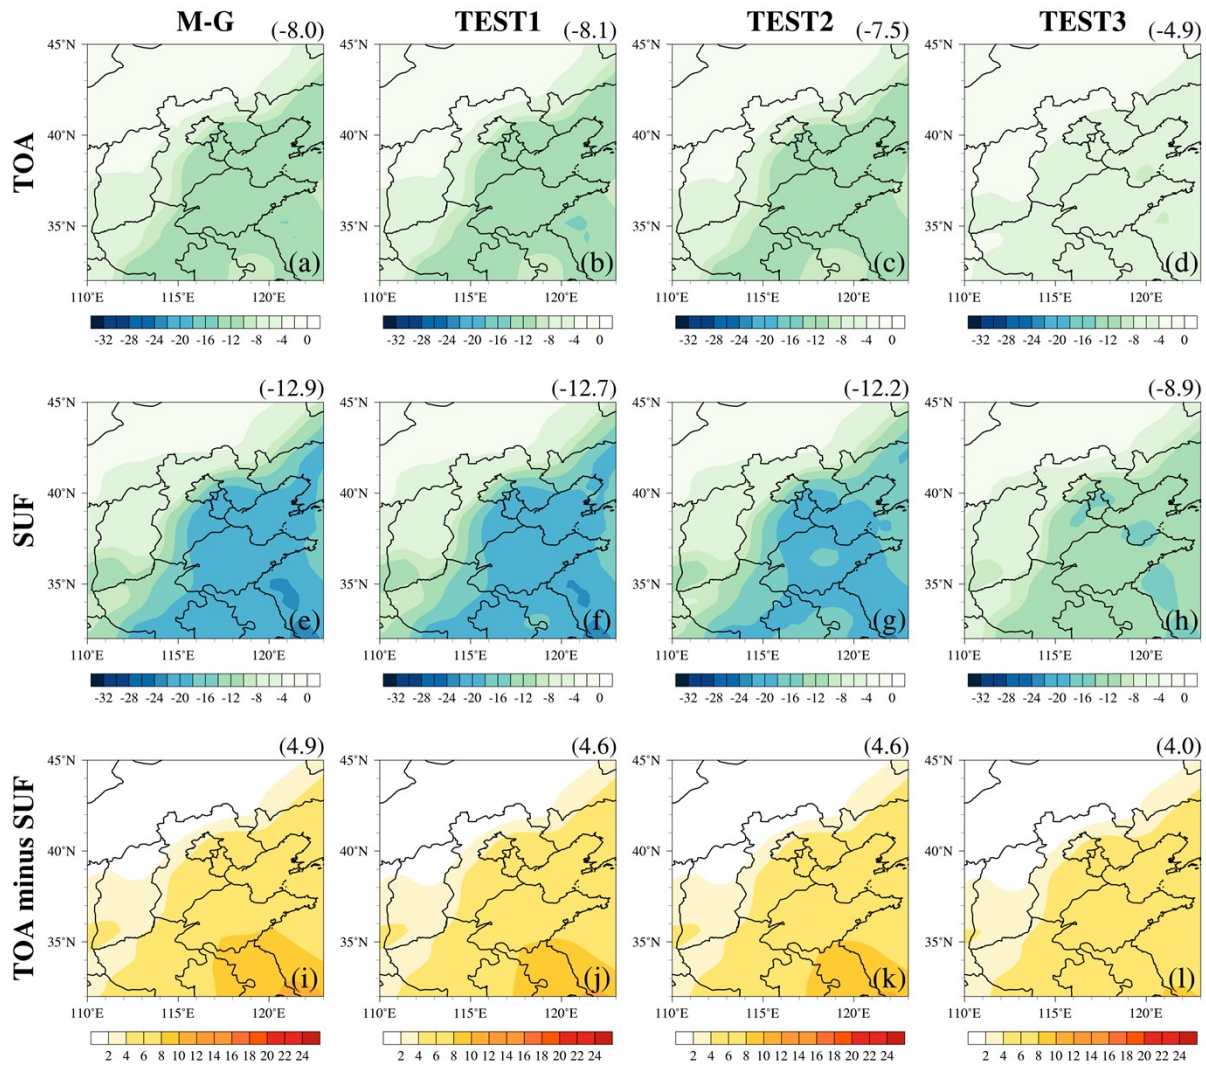

Figure S4 Model simulated period-mean DREs at TOA (a-d), at the surface (e-h), and in the atmosphere (i-l) during the haze episode on 8-13 February 2020, from the M-G and the three test cases regarding affecting factors of size distribution, coating fraction and hygroscopic growth. The numbers in the upper-right corner of each panel represent domain average values (unit: W m<sup>-2</sup>).



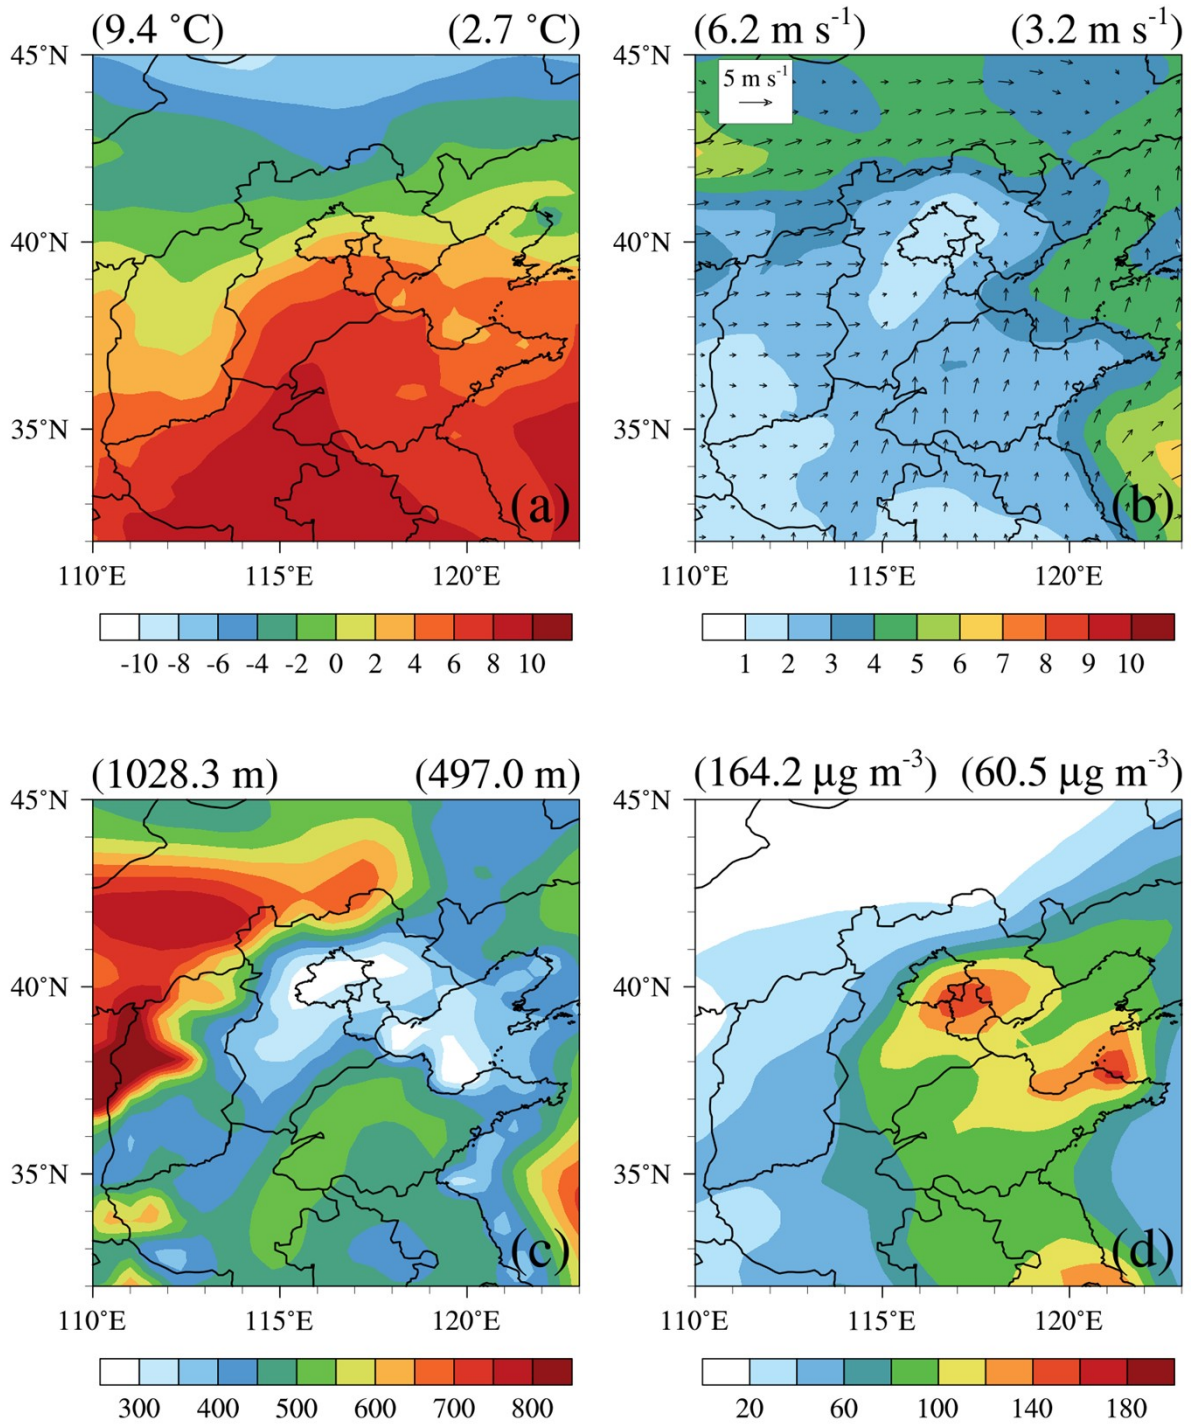

Figure S5 Model simulated period-mean (a) 2m temperature (T2, °C), (b) 10m wind (WS10, m s<sup>-1</sup>), (c) planetary boundary layer height (PBLH, m), (d) PM<sub>2.5</sub> concentration (PM<sub>2.5</sub>, μg m<sup>-3</sup>) from CASE0 during the haze episode on 8-13 February 2020. The numbers in the upper-left and upper-right corners of each panel represent the maximum and average values in the domain, respectively.

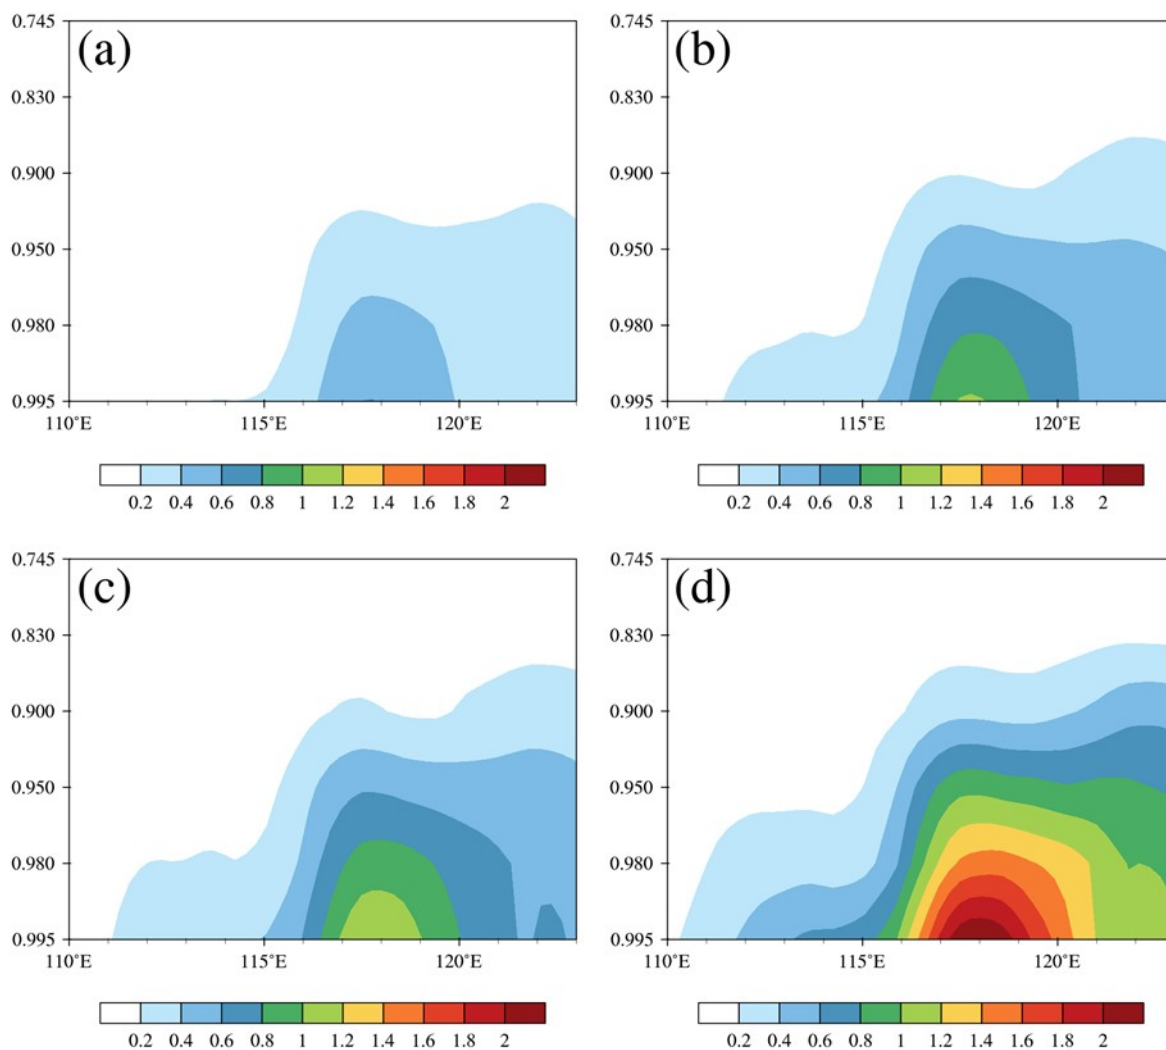

Figure S6 Model simulated period-mean vertical distributions of AHR induced by aerosols at 40°N from (a) EXT, (b) M-G, (c) C-S, and (d) HOM cases during the haze episode on 8-13, February 2020 (unit: K/day). The y-axis uses sigma coordinate.
